# Supplementary material for: The Synergistic Effect of MoS2 and NiS on the Electrical Properties of Iron Anodes for Ni-Fe Batteries
Source: MDPI journal article supplement (doi:10.3390/nano12193472), 2022-10-04
Supplement: s1 [file s1]

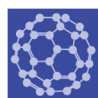

## Supplementary Materials

# The Synergistic Effect of MoS<sub>2</sub> and NiS on the Electrical Properties of Iron Anodes for Ni-Fe Batteries

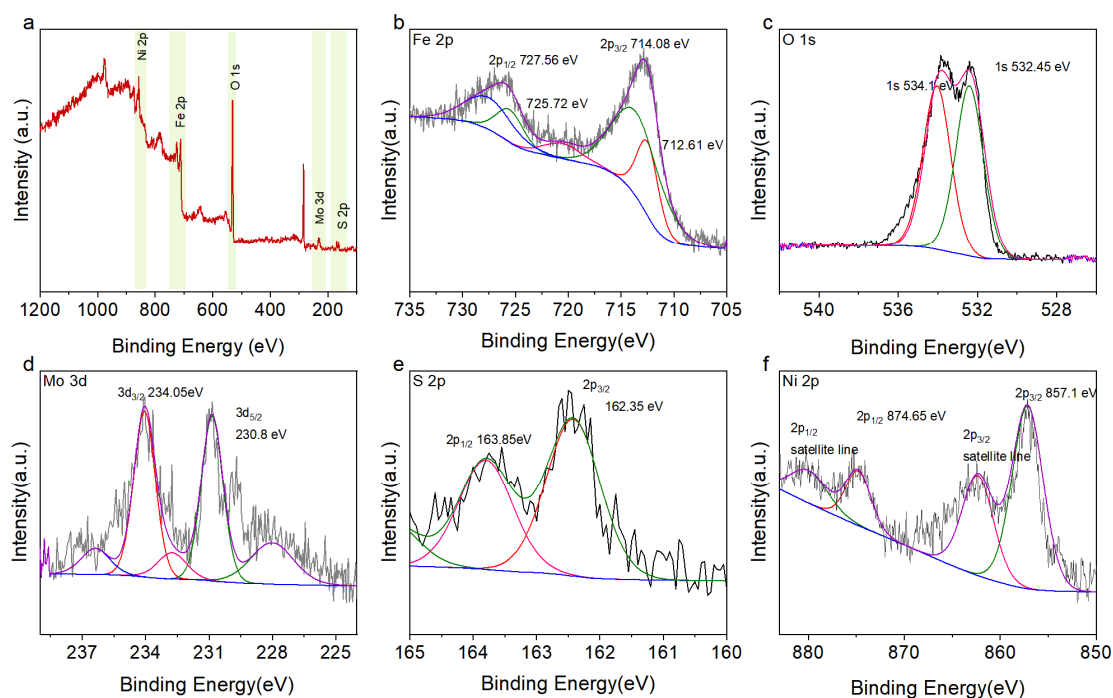

**Figure S1.** XPS results of Fe<sub>3</sub>O<sub>4</sub>/MoS<sub>2</sub>/NiS (5%). (a) Wide-range scanning result of XPS spectrum. High-resolution XPS spectrum of Fe 2p (b), O 1s (c), Mo 3d (d), S 2p (e) and Ni 2p (f).

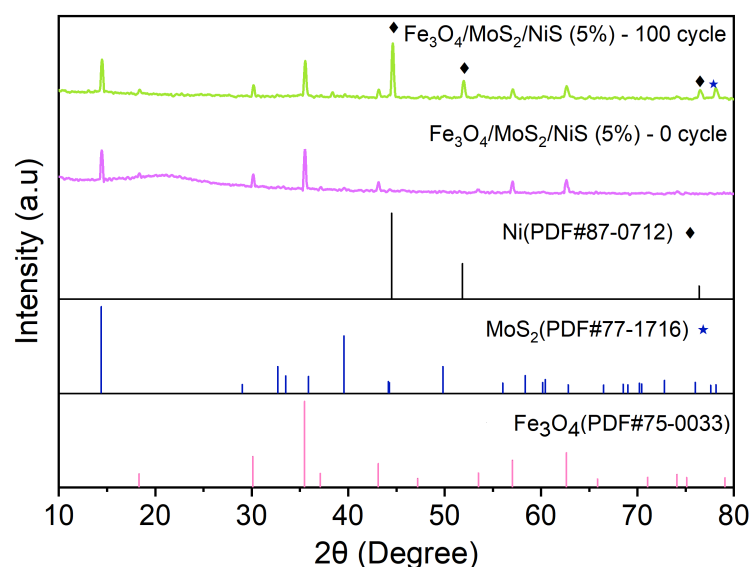

**Figure S2.** XRD patterns of the Fe<sub>3</sub>O<sub>4</sub>/MoS<sub>2</sub>/NiS (5%) sample before cycle and after 100 cycles.

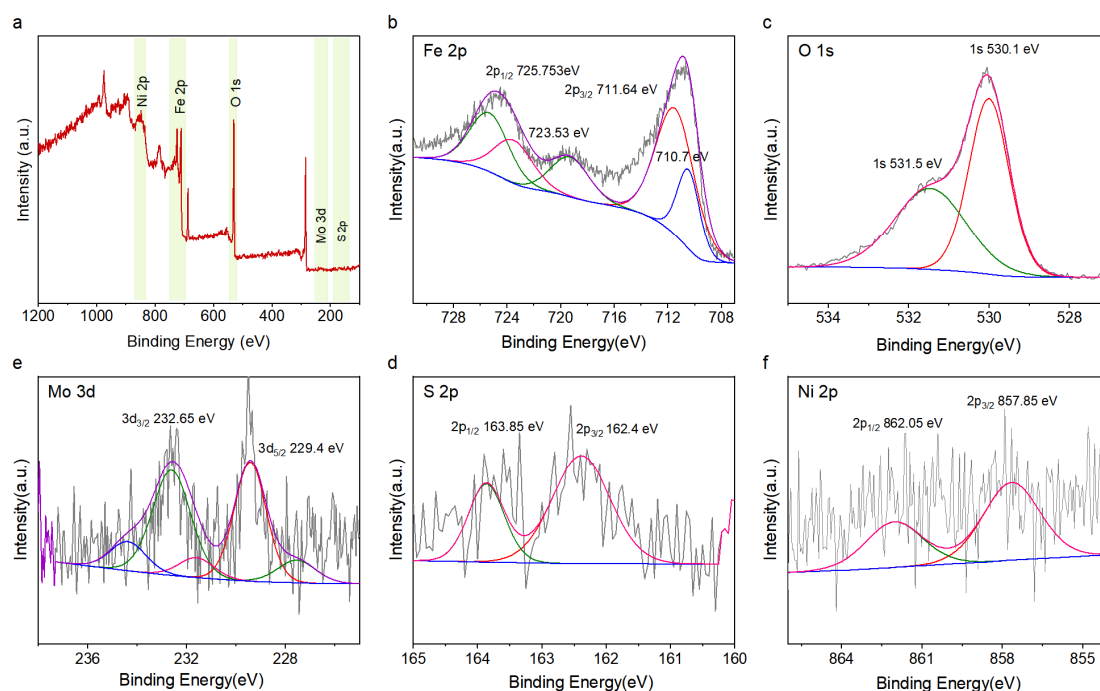

**Figure S3.** XPS results of  $\text{Fe}_3\text{O}_4/\text{MoS}_2/\text{NiS}$  (5%) samples after 100 cycles. (a) Wide-range scanning result of XPS spectrum. High-resolution XPS spectrum of Fe 2p (b), O 1s (c), Mo 3d (d), S 2p (e) and Ni 2p (f).

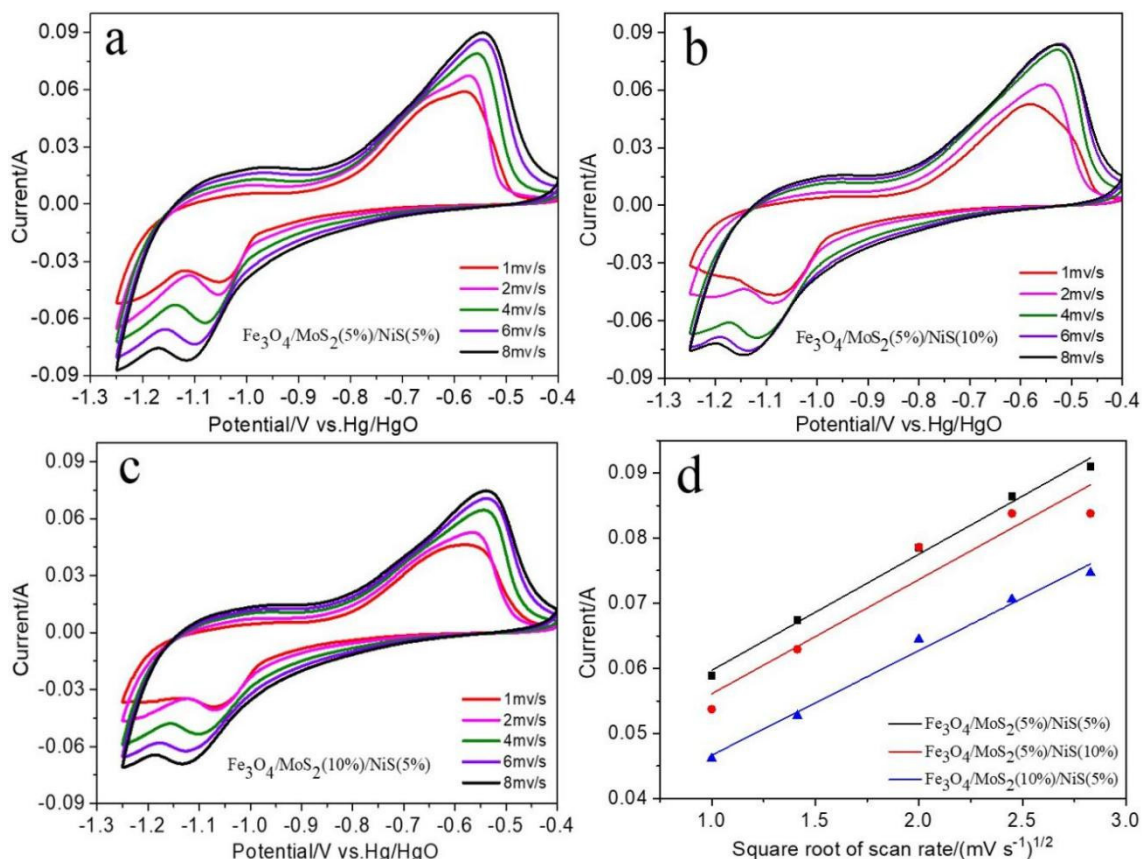

**Figure S4.** (a-c) Cyclic voltammetry curves of three samples; (d) relationships between the maximum oxidation peak currents of the three electrodes and the square root of the scanning rate.

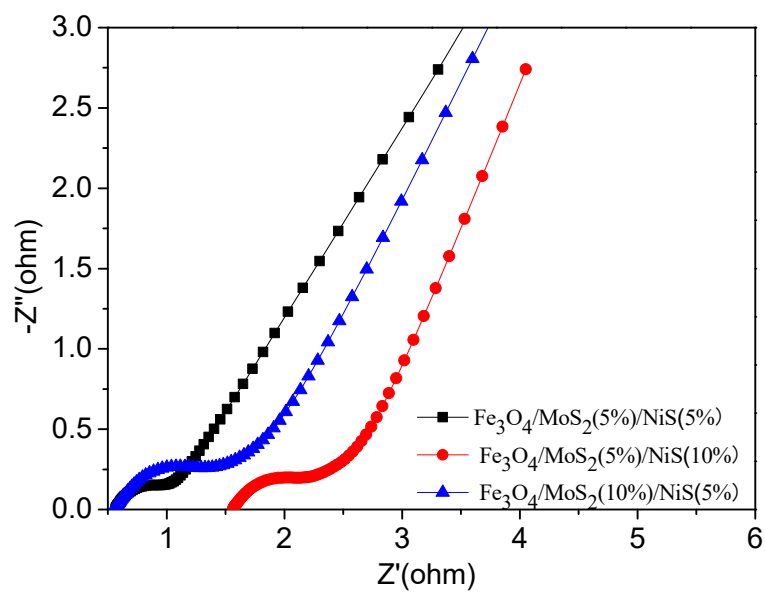

**Figure S5.** AC impedance spectra of the  $\text{Fe}_3\text{O}_4/\text{MoS}_2$  (5%)/NiS (5%),  $\text{Fe}_3\text{O}_4/\text{MoS}_2$  (5%)/NiS (10%) and  $\text{Fe}_3\text{O}_4/\text{MoS}_2$  (10%)/NiS (5%) electrodes.

**Table S1.** Anode and cathode potentials and potential differences of three sample electrodes.

| Electrode                                           | $E_O$ (mV) | $E_R$ (mV) | $\Delta E_{O-R}$ (mV) |
|-----------------------------------------------------|------------|------------|-----------------------|
| $\text{Fe}_3\text{O}_4/\text{MoS}_2$ (5%)/NiS (5%)  | 583        | 1053       | 470                   |
| $\text{Fe}_3\text{O}_4/\text{MoS}_2$ (5%)/NiS (10%) | 582        | 1080       | 498                   |
| $\text{Fe}_3\text{O}_4/\text{MoS}_2$ (10%)/NiS (5%) | 576        | 1075       | 499                   |
